# Supplementary material for: Constructing graphitization-graded porous carbon using olive leaves as a carbon source for a high-performance zinc-ion hybrid capacitor
Source: Royal Society of Chemistry journal article supplement (doi:10.1039/d4tc02526a), 2024-01-01
Supplement: d4tc02526a1.pdf [file d4tc02526a1.pdf]

## Supporting Information

### **Constructing graphitization graded porous carbon using olive leaves as a carbon source for high-performance zinc-ion hybrid capacitor**

Junjie Zhang<sup>a</sup>, Xingyu Liu<sup>a</sup>, Xiang Wu<sup>a,\*</sup>, Young-Rae Cho<sup>b,\*</sup>

<sup>a</sup>School of Materials Science and Engineering, Shenyang University of Technology,

Shenyang 110870, P. R. China

<sup>b</sup>School of Materials Science and Engineering, Pusan National University, Busan

46241, South Korea

\*Corresponding address: wuxiang05@sut.edu.cn; yescho@pusan.ac.kr

## Experiment Section

Fabrication of OLPCs from wasted olive leaves: The olive leaves were washed several times with distilled water (DL) to remove the surface dust, dried under blast at 100 °C for 12 h. The leaves were then crushed and ground to powder. Then it was pre-carbonized in nitrogen atmosphere at 600 °C for 2 h to obtain olive leaf carbonate (OLPC). OLPC was mixed with activator at different mass ratios (KOH: C = 1:1, 2:1, 3:1). A little DL was added and ultrasonicated to make the mixture completely homogeneous, then most of the water was evaporated by magnetic stirring at constant temperature. After drying, it was transferred to a tube furnace and annealed at 750 °C for 2 h in a nitrogen atmosphere (heating rate: 5 °C/min). The annealed product was etched with 2 M HCl, then washed sufficiently with DL to neutral, and dried at 100 °C for 12 h to obtain OLPC. The product was named OLPC-X, and X was the mass ratio of KOH to carbon. That is, OLPC-1, OLPC-2, OLPC-3. The initial mass of olive leaves is 0.248 g, and the OLPC obtained after pyrolysis at 750 °C is 0.213 g. The production yield of carbon materials is 85.9 %.

### **Materials characterization**

The crystal structures of the samples were studied by X-ray diffractometer (XRD, Shimadzu-7000,  $\lambda=0.1541$  nm, 40 kV). In addition, the elemental composition of the sample was characterized by X-ray photoelectron spectroscopy (XPS, Thermo Scientific K-Alpha). N<sub>2</sub> adsorption and desorption isotherms (JW-TB200) were used to study their specific surface area and pore size distribution by the Brunauer-Emmett-Teller (BET) method. The morphology and microstructure of the samples were

observed by scanning electron microscope (SEM, Gemini ZEISS Sigma 300) and high-resolution transmission electron microscope (JEM-2100 plus). The wettability of the electrodes was measured using a contact angle tester (SDC-350KS).

### **Electrochemical characterization**

The active material (OLPC), acetylene black and polyvinylidene fluoride (PVDF) were mixed homogeneously into N-methyl-2-pyrrolidone (NMP) at a mass ratio of 8:1:1. The above paste was pressed onto a carbon paper with a diameter of 1 cm and dried under vacuum at 60 °C for 12 h. Then, the CR2032 button batteries are assembled using zinc foil as anode and the as-obtained sample as cathode. The electrolyte was weakly acidic 2 M ZnSO<sub>4</sub>. The average loading mass of cathode is 1.3-1.8 mg cm<sup>-2</sup>. An automated battery tester (Neware, CT-4008 T) was used to test the electrochemical performance of the batteries. Cyclic voltammetry (CV) and electrochemical impedance spectroscopy (EIS) tests were also performed on a CHI660E electrochemical workstation. The wettability of the electrodes was measured using a contact angle tester (SZ-CAMC32).

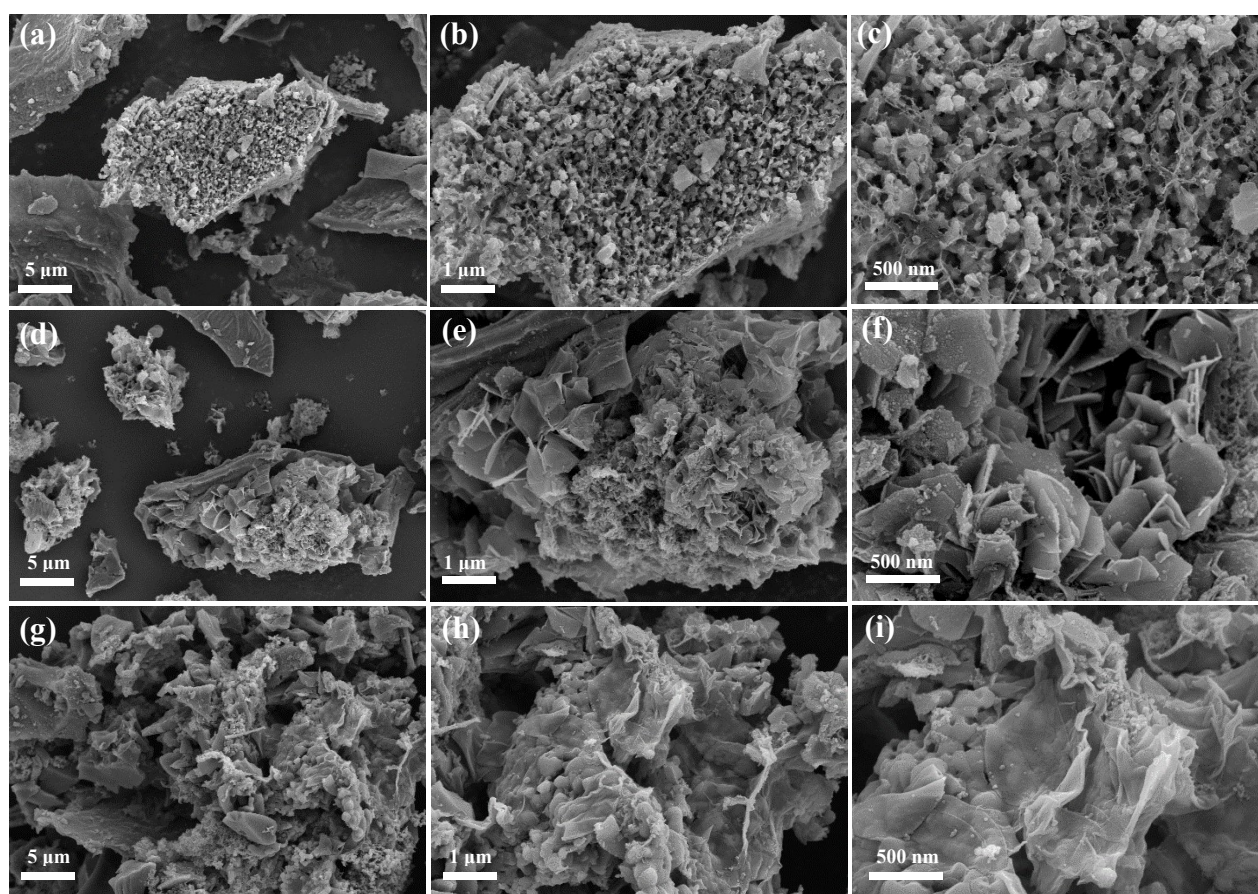

**Figure S1** SEM images of (a-c) blank material, (d-f) OLPC-1 and (g-i) OLPC-3

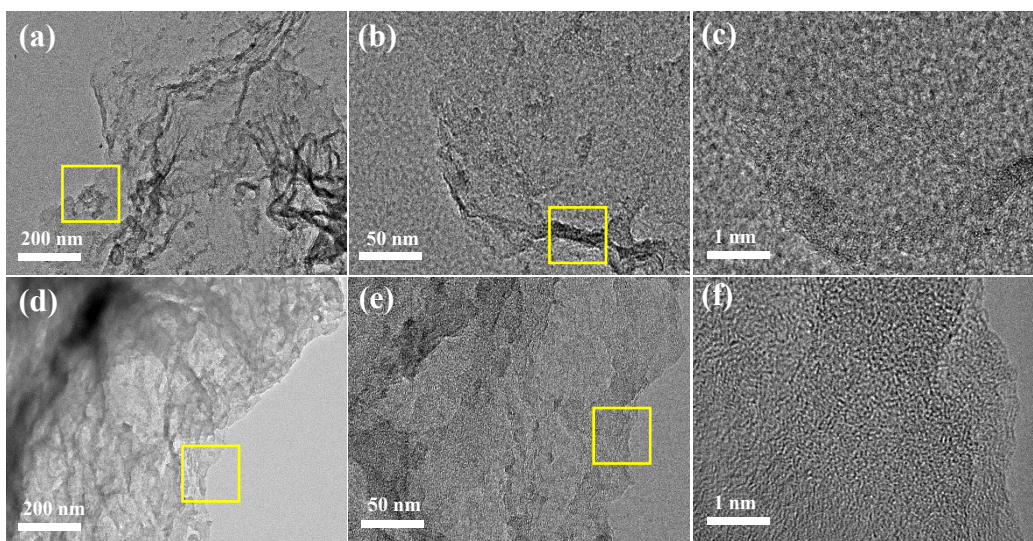

**Figure S2** TEM images (a-c) OLPC-1 and (d-f) OLPC-3

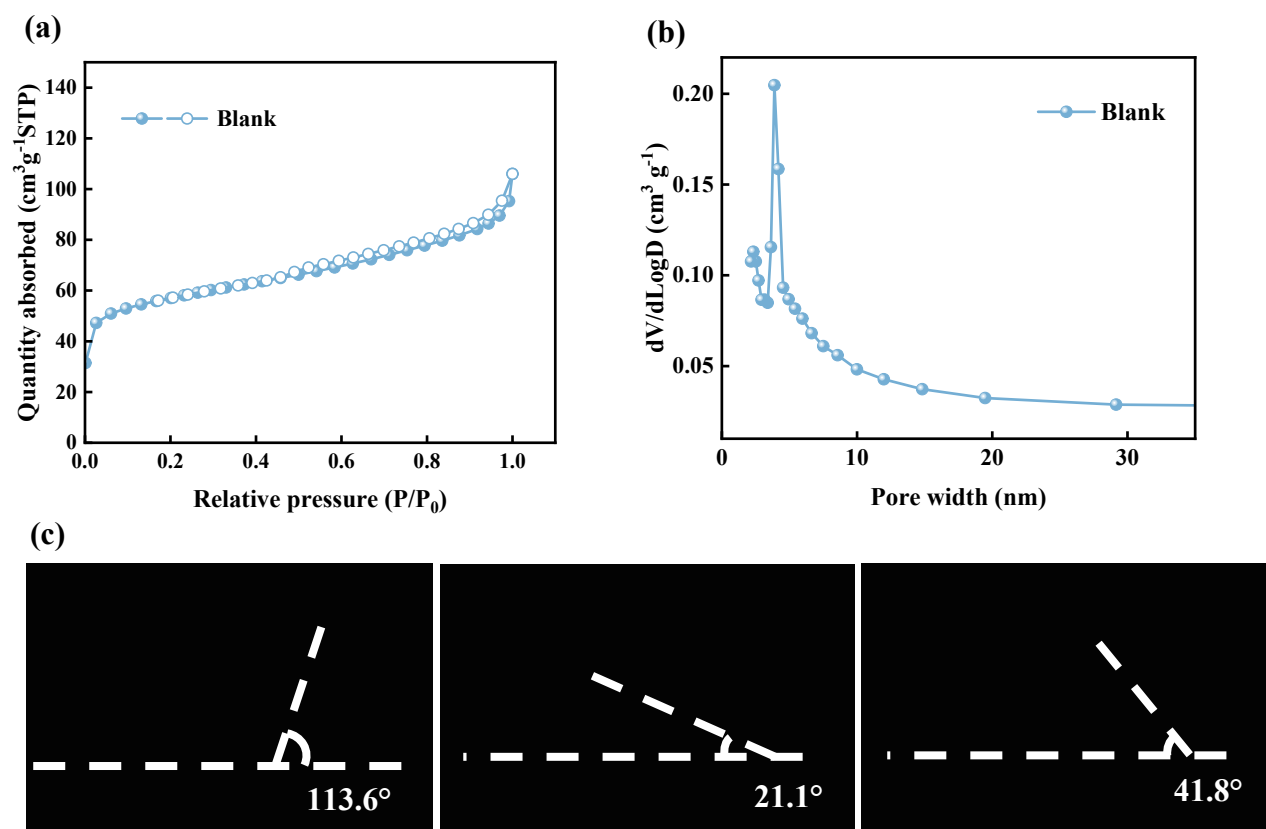

**Figure S3** (a)  $\text{N}_2$  adsorption/desorption isotherm (b) Pore size distribution curve

(c) Water contact angles of wasted OLPC materials

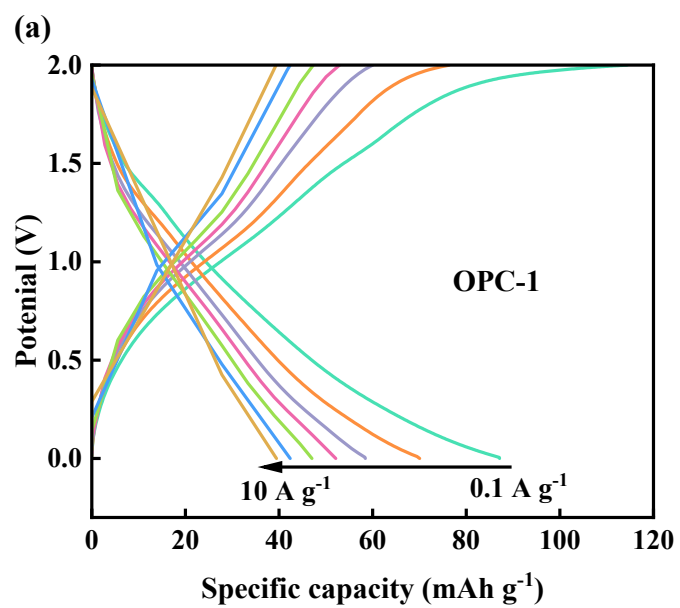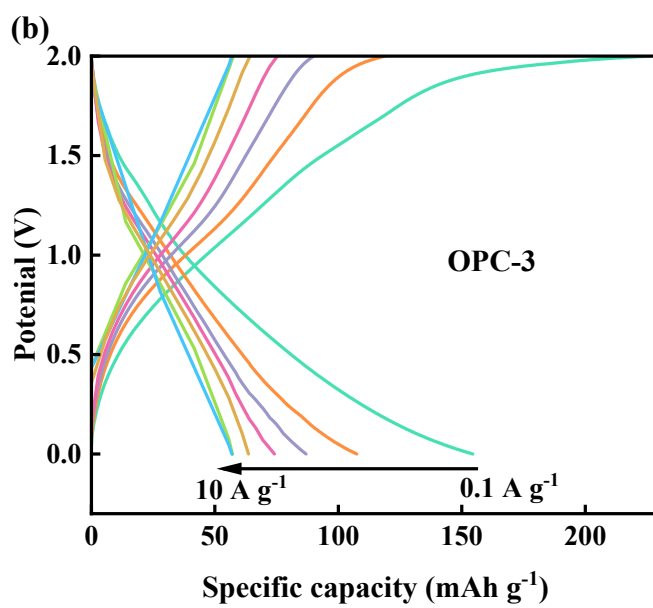

**Figure S4** GCD curves (a) OLPC-1 sample (b) OLPC-3 sample

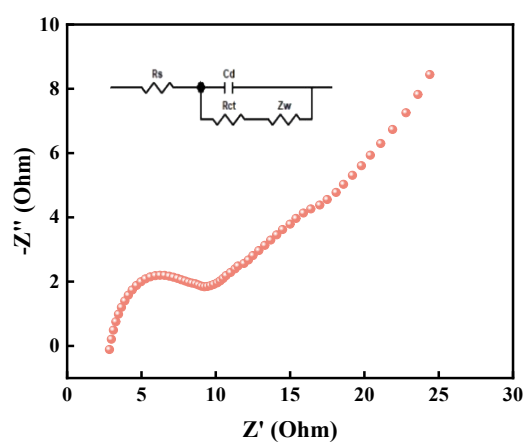

**Figure S5** EIS spectra of the OLPC-2-built quasi-solid ZHSC device



**Table S1** Specific surface area, total pore volume and mean pore diameter of synthetic samples with different activation temperatures

| Samples      | Specific Surface Area [m <sup>2</sup> /g] | Total Pore Volume [cm <sup>3</sup> /g] | Average Pore Diameter [nm] |
|--------------|-------------------------------------------|----------------------------------------|----------------------------|
| OLPC-2/700°C | 1105                                      | 0.675                                  | 3.258                      |
| OLPC-2/750°C | 1497                                      | 1.017                                  | 4.292                      |
| OLPC-2/800°C | 1286                                      | 0.739                                  | 3.209                      |

**Table S2** Comparison of Zn<sup>2+</sup> storage capacities of aqueous ZHSCs assembled by different carbon-based cathodes

| Materials            | Specific capacity (mAh g <sup>-1</sup> ) | Current density (A g <sup>-1</sup> ) | Energy density (Wh kg <sup>-1</sup> ) | Capacity retention, cycles | Refs.     |
|----------------------|------------------------------------------|--------------------------------------|---------------------------------------|----------------------------|-----------|
| OLCK4                | 121.7                                    | 0.3                                  | 94.3                                  | 86.7%, 10,000              | 1         |
| MEHC-3               | 132.9                                    | 0.2                                  | 106.4                                 | 94.7%, 20,000              | 2         |
| PHCA                 | 143.7                                    | 1.0                                  | 129.3                                 | 92.0%, 10000               | 3         |
| VO <sub>0.9</sub> /C | 146                                      | 1.0                                  | 126.5                                 | 84.0%, 10,000              | 4         |
| PCNs-2               | 149.0                                    | 0.2                                  | 119.0                                 | 91.0%, 10,000              | 5         |
| OLPC-2               | 179                                      | 0.1                                  | 161.1                                 | 92.4%, 10000               | This work |

## References

- 1 H. Zhang, L. Wang, Y. Zhang, Y. Liu, J. Zhang, L. Sun, F. Feng and Y. Zhang, *Interf. Sci.*, 2023, **635**, 94-104.
- 2 D. Wang, Z. Pan, G. Chen and Z. Lu, *Electrochimica Acta*, 2021, **379**, 138170.
- 3 H. Fan, S. Zhou, Q. Chen, G. Gao, Q. Ban, Z. Xu, F. He, G. Hu and X. Hu, *J. Power Sources*, 2021, **493**, 229687.
- 4 Y. Liu, A. Umar and X. Wu, *Rare Metals*, 2022, **41**, 2985-2991.
- 5 D. Wang, Z. Pan and Z. Lu, *Micropore. Mesopore. Mater.*, 2020, **306**, 110445.
